# Supplementary material
Source: Springer Nature journal article supplement (https://www.springermedizin.de/resource/supplementary/40345_2013_12_MOESM2_ESM.pdf/25658290)

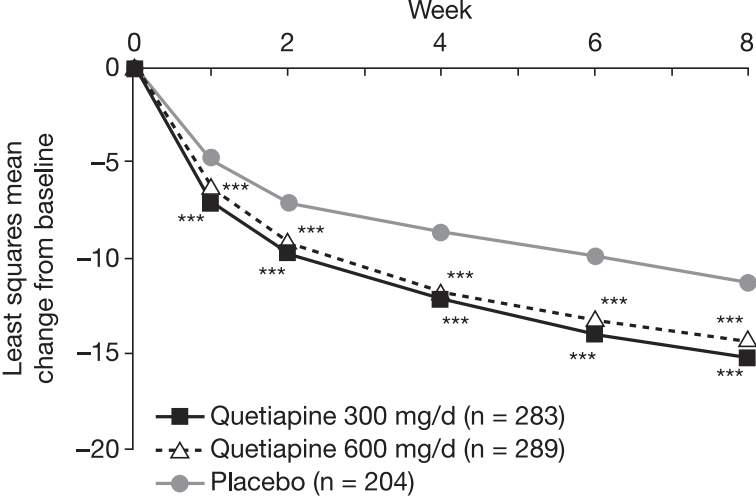

Supplement: MOESM2 [file 25658290]
